# Supplementary material
Source: PubMed Central journal article supplement (PMC2584987)

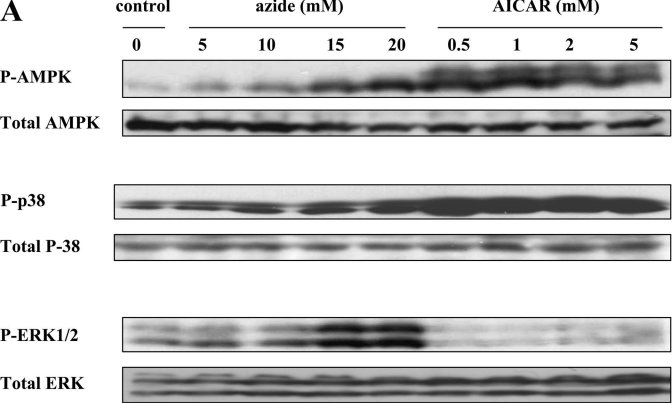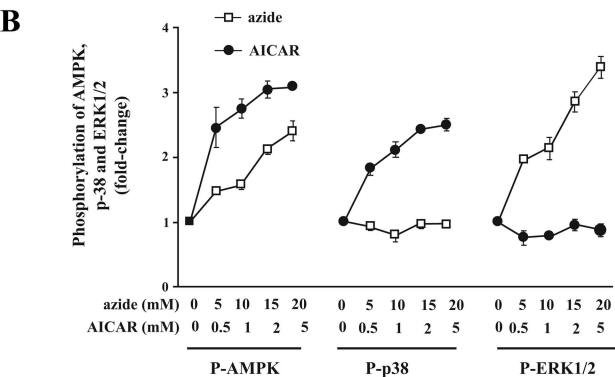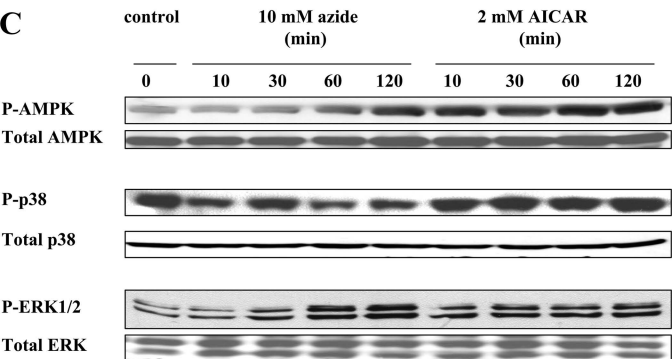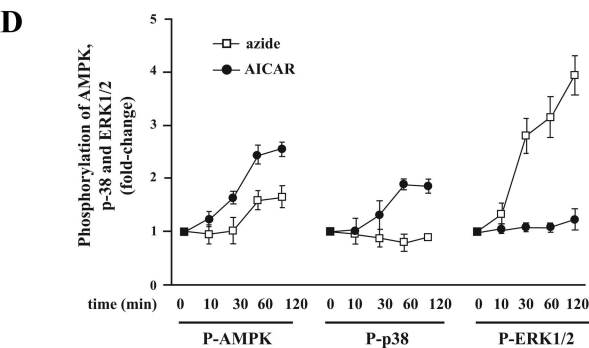

Supplement: 00040.2008_1.pdf [file 00040.2008_1.pdf]

**A**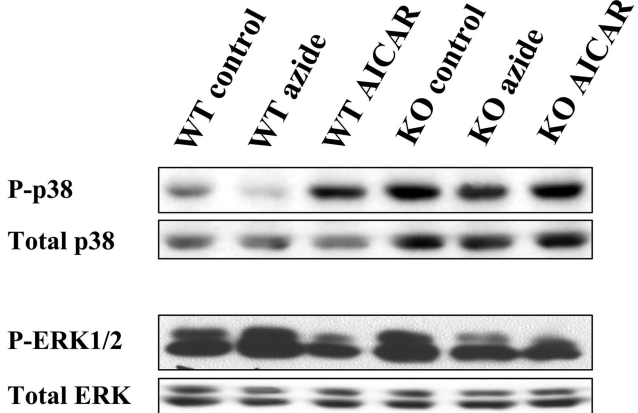**B**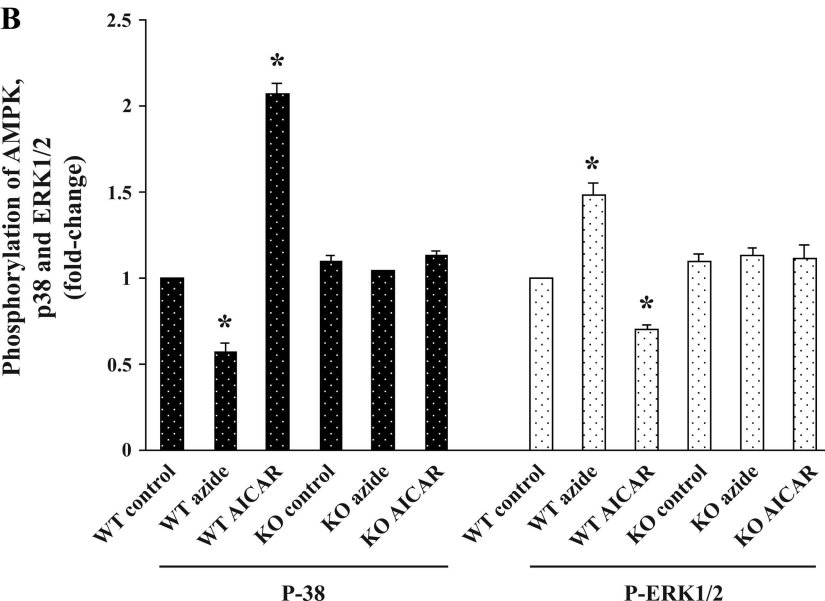

Supplement: 00040.2008_2.pdf [file 00040.2008_2.pdf]

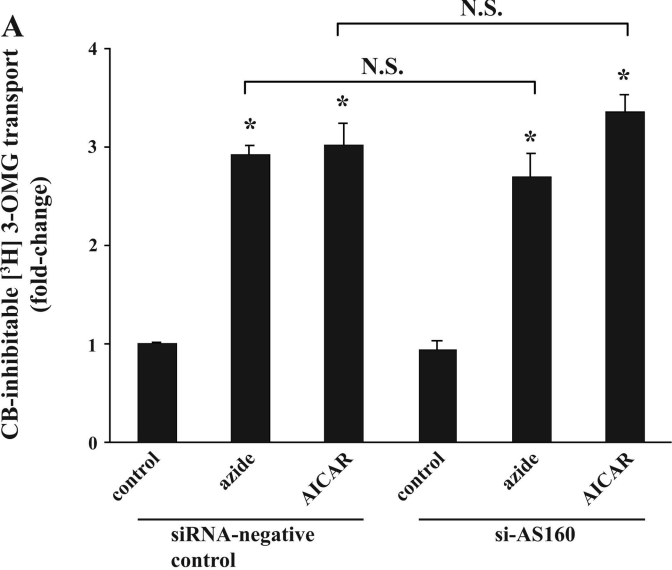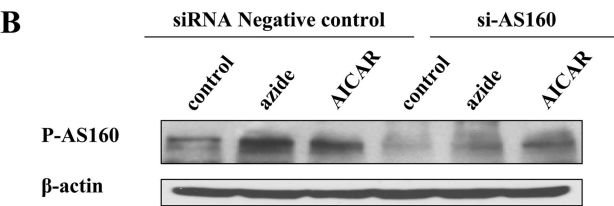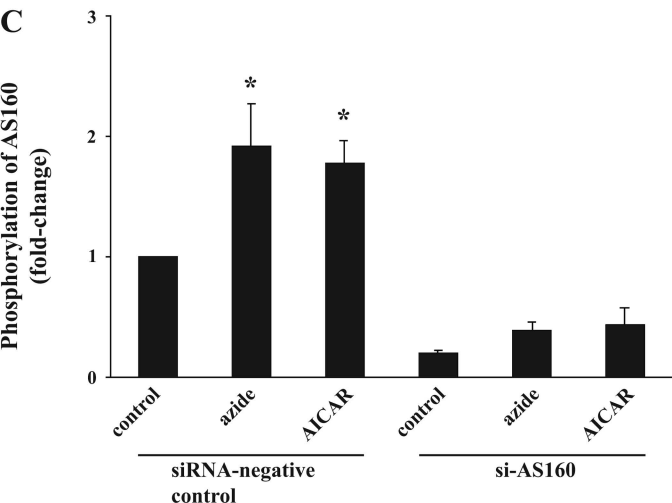

Supplement: 00040.2008_3.pdf [file 00040.2008_3.pdf]
